# Supplementary material for: Comprehensive Association of C-reactive Protein-Triglyceride Glucose Index with 14 New-Onset Chronic Diseases: Evidence from the China Health and Retirement Longitudinal Study
Source: Research Square preprint supplement (doi:10.21203/rs.3.rs-8279156/v1), 2025-12-11
Supplement: Supplementary file 1 [file 1ae3f49ebb04999fec62073b.xlsx]

## Sheet: 刚刚生成的滞后2年模型的模型需要构图和构表吗
Supplementary Table 1：Robustness Check: Main vs. Sensitivity Analysis
Disease Outcome	Main Analysis (Model 2) HR (95% CI)	P-value	Sensitivity Analysis (Lag-2yr) HR (95% CI)	P-value	Conclusion
Diabetes	1.86 (1.67-2.06)	<0.001	1.79 (1.60-2.01)	<0.001	Robust
Stroke	1.42 (1.23-1.64)	<0.001	1.38 (1.19-1.60)	<0.001	Robust
Dyslipidemia	1.36 (1.25-1.48)	<0.001	1.30 (1.19-1.43)	<0.001	Robust
Liver Disease	1.16 (1.01-1.33)	0.036	1.13 (0.98-1.31)	0.099	Attenuated
Note: Models were adjusted for age, sex, BMI, systolic blood pressure, diastolic blood pressure, LDL-C, smoking status, and alcohol consumption, except for the stratification variable itself (e.g., sex was not adjusted in the sex-stratified subgroup). HR, hazard ratio; CI, confidence interval. P for interaction indicates the statistical significance of the interaction between CTI and the stratifi…
