# Supplementary material for: Comprehensive Association of C-reactive Protein-Triglyceride Glucose Index with 14 New-Onset Chronic Diseases: Evidence from the China Health and Retirement Longitudinal Study
Source: Research Square preprint supplement (doi:10.21203/rs.3.rs-8279156/v1), 2025-12-11
Supplement: Supplementary file 2 [file 9c508c94bad707d530c978f1.xlsx]

## Sheet: Sheet1
Table 3：Subgroup Analysis Results: Characteristics of Diabetes Mellitus, Stroke, and Dyslipidemia in Subgroups Stratified by Age, Gender, and BMI
Disease	Subgroup	No. of Participants	No. of Events	Adjusted HR (95% CI)	P-value	P for Interaction
Diabetes	Age < 60	4647	634	2.13 (1.85-2.45)	<0.001	-
	Age ≥ 60	3913	505	1.55 (1.32-1.82)	<0.001
	Male	4034	471	1.70 (1.45-1.99)	<0.001	-
	Female	4526	668	1.99 (1.73-2.29)	<0.001
	BMI < 24 kg/m²	5209	476	1.48 (1.26-1.75)	<0.001	-
	BMI ≥ 24 kg/m²	3351	663	2.31 (2.01-2.67)	<0.001
Stroke	Age < 60	4849	278	1.66 (1.34-2.05)	<0.001	-
	Age ≥ 60	4075	357	1.24 (1.02-1.50)	0.03
	Male	4156	306	1.33 (1.09-1.63)	0.006	-
	Female	4768	329	1.51 (1.24-1.85)	<0.001
	BMI < 24 kg/m²	5316	313	1.59 (1.31-1.93)	<0.001	-
	BMI ≥ 24 kg/m²	3608	322	1.35 (1.10-1.66)	0.004
Dyslipidemia	Age < 60	4378	1120	1.49 (1.34-1.66)	<0.001	-
	Age ≥ 60	3741	850	1.19 (1.05-1.35)	0.007
	Male	3855	818	1.37 (1.21-1.55)	<0.001	-
	Female	4264	1152	1.37 (1.23-1.53)	<0.001
	BMI < 24 kg/m²	5062	928	1.27 (1.13-1.43)	<0.001	-
	BMI ≥ 24 kg/m²	3057	1042	1.50 (1.33-1.68)	<0.001
Note: Models were adjusted for age, sex, BMI, systolic blood pressure, diastolic blood pressure, LDL-C, smoking status, and alcohol consumption, except for the stratification variable itself (e.g., sex was not adjusted in the sex-stratified subgroup). HR, hazard ratio; CI, confidence interval. P for interaction indicates the statistical significance of the interaction between CTI and the stratifi…
