# Supplementary material for: Comprehensive Association of C-reactive Protein-Triglyceride Glucose Index with 14 New-Onset Chronic Diseases: Evidence from the China Health and Retirement Longitudinal Study
Source: Research Square preprint supplement (doi:10.21203/rs.3.rs-8279156/v1), 2025-12-11
Supplement: Supplementary file 3 [file b00f98f08544bce17a68c0f8.xlsx]

## Sheet: Cox Model Results
Table 2. Associations between C-reactive Protein-Triglyceride-Glucose Index and 14 Incident Chronic Diseases: Cox Proportional Hazards Models
Disease Category	Disease	Model 1: HR (95% CI)	Model 1: P-value	Model 2: HR (95% CI)	Model 2: P-value
Metabolic & Cardiovascular Diseases
	Diabetes	2.11 (1.91-2.33)	<0.001	1.86 (1.67-2.06)	<0.001
	Dyslipidemia	1.52 (1.41-1.64)	<0.001	1.36 (1.25-1.48)	<0.001
	Hypertension	1.35 (1.25-1.46)	<0.001	1.07 (0.99-1.16)	0.109
	Stroke	1.69 (1.48-1.93)	<0.001	1.42 (1.23-1.64)	<0.001
	Heart Disease	1.19 (1.08-1.30)	<0.001	1.02 (0.93-1.12)	0.666
Organ Function & Respiratory Diseases
	Liver Disease	1.20 (1.06-1.38)	0.006	1.16 (1.01-1.33)	0.036
	Lung Disease	1.04 (0.95-1.15)	0.398	1.07 (0.96-1.19)	0.211
	Kidney Disease	1.15 (1.02-1.28)	0.018	1.10 (0.98-1.24)	0.112
	Asthma	1.19 (1.02-1.39)	0.031	1.15 (0.98-1.36)	0.087
Other System Diseases
	Digestive Disease	0.88 (0.81-0.97)	0.007	0.94 (0.85-1.03)	0.181
	Psychiatric	0.84 (0.68-1.02)	0.079	0.83 (0.67-1.02)	0.08
	Memory Disease	1.12 (0.98-1.28)	0.097	1.00 (0.86-1.15)	0.973
	Arthritis	0.97 (0.89-1.05)	0.451	0.96 (0.88-1.05)	0.401
	Cancer	1.10 (0.89-1.36)	0.372	1.03 (0.83-1.29)	0.792
Notes: Model 1: Unadjusted model. Model 2: Adjusted for age, sex, BMI, systolic blood pressure, diastolic blood pressure, LDL-C, smoking status, and alcohol consumption. Abbreviations: HR, Hazard Ratio; CI, Confidence Interval. Statistical significance: $P < 0.05$ is considered statistically significant (indicated in bold).
