# Supplementary material for: Comprehensive Association of C-reactive Protein-Triglyceride Glucose Index with 14 New-Onset Chronic Diseases: Evidence from the China Health and Retirement Longitudinal Study
Source: Research Square preprint supplement (doi:10.21203/rs.3.rs-8279156/v1), 2025-12-11
Supplement: Supplementary file 4 [file cdb4fe7eaedd658b89e334a9.docx]

***Table 1. Clinical and Demographic Characteristics by CTI Quartiles***

| **Variable** | **Total (N=9194)** | **Q1 (Lowest) (N=2298)** | **Q2 (N=2299)** | **Q3 (N=2298)** | **Q4 (Highest) (N=2299)** | **P-value** |
| --- | --- | --- | --- | --- | --- | --- |
| Demographics |  |  |  |  |  |  |
| Age, years | 59.59 ± 9.36 | 58.06 ± 9.11 | 59.68 ± 9.33 | 60.11 ± 9.40 | 60.50 ± 9.42 | < 0.001 |
| Gender , n (%) |  |  |  |  |  | 0.073 |
| Male | 4296 (46.7%) | 1091 (47.5%) | 1116 (48.6%) | 1035 (45.0%) | 1054 (45.8%) |  |
| Female | 4898 (53.3%) | 1208 (52.5%) | 1182 (51.4%) | 1263 (55.0%) | 1245 (54.2%) |  |
| Marital Status , n (%) |  |  |  |  |  | < 0.05 |
| Married | 7655 (83.3%) | 1918 (83.4%) | 1924 (83.7%) | 1929 (83.9%) | 1884 (81.9%) |  |
| Widowed | 990 (10.8%) | 210 (9.1%) | 242 (10.5%) | 255 (11.1%) | 283 (12.3%) |  |
| Married but separated | 373 (4.1%) | 117 (5.1%) | 86 (3.7%) | 78 (3.4%) | 92 (4.0%) |  |
| Others <sup>a</sup> | 176 (1.9%) | 54 (2.3%) | 46 (2.0%) | 36 (1.6%) | 40 (1.8%) |  |
| Household registration status , n (%) |  |  |  |  |  | < 0.001 |
| Agricultural | 7618 (82.9%) | 1976 (86.0%) | 1949 (84.8%) | 1872 (81.5%) | 1821 (79.2%) |  |
| Non-Agricultural | 1532 (16.7%) | 312 (13.6%) | 332 (14.4%) | 419 (18.2%) | 469 (20.4%) |  |
| Others | 44 (0.4%) | 11 (0.5%) | 15 (0.7%) | 6 (0.2%) | 9 (0.4%) |  |
| Clinical Characteristics |  |  |  |  |  |  |
| BMI, kg/m² | 23.47 ± 3.78 | 22.15 ± 3.19 | 22.92 ± 3.59 | 24.04 ± 3.67 | 24.77 ± 4.07 | < 0.001 |
| SBP, mmHg | 129.54 ± 21.44 | 125.13 ± 21.01 | 128.00 ± 20.73 | 131.23 ± 21.13 | 133.81 ± 21.89 | < 0.001 |
| DBP, mmHg | 75.34 ± 12.20 | 72.98 ± 12.04 | 74.69 ± 12.05 | 76.28 ± 12.20 | 77.43 ± 12.07 | < 0.001 |
| Uric Acid, mg/dL | 4.46 ± 1.26 | 4.10 ± 1.11 | 4.35 ± 1.19 | 4.58 ± 1.23 | 4.82 ± 1.37 | < 0.001 |
| CTI Components |  |  |  |  |  |  |
| C-reactive protein, mg/L | 2.46 ± 5.68 | 0.49 ± 0.26 | 0.93 ± 0.54 | 1.77 ± 1.16 | 6.66 ± 10.15 | < 0.001 |
| Glucose, mg/dL | 109.75 ± 34.10 | 98.32 ± 15.43 | 103.70 ± 20.21 | 109.03 ± 25.31 | 127.96 ± 53.54 | < 0.001 |
| Triglycerides, mg/dL | 131.64 ± 98.91 | 78.11 ± 29.07 | 107.04 ± 42.40 | 135.11 ± 62.40 | 206.28 ± 153.45 | < 0.001 |
| HDL-C, mg/dL | 51.21 ± 15.19 | 59.03 ± 14.82 | 53.50 ± 14.16 | 49.18 ± 13.58 | 43.14 ± 13.51 | < 0.001 |
| LDL-C, mg/dL | 116.88 ± 34.92 | 111.98 ± 29.66 | 118.84 ± 32.87 | 120.82 ± 35.18 | 115.87 ± 40.49 | < 0.001 |

Note: Continuous variables are presented as mean ± standard deviation (SD), and categorical variables as n (percentage). P-values were calculated using the Kruskal-Wallis test for continuous variables and the chi-square test for categorical variables.

Abbreviations: BMI, body mass index; SBP, systolic blood pressure; DBP, diastolic blood pressure.Other marital statuses include never married, divorced, and separated.
